# Supplementary material
Source: Elsevier journal article supplement (https://www.sciencedirect.com/science/article/pii/S1885585712002344)

## Acerca del proyecto "La Semana del Pulso"

→ ¿Sabías que 1 de cada 5 infartos cerebrales pueden estar relacionados con una arritmia cardíaca?

Esa arritmia se llama fibrilación auricular.

¡Y es bastante frecuente! Por encima de los 75 años está presente en un 10 a 15% de las personas. Muchas veces, las personas que tienen esta arritmia no la notan. Lo bueno es que podemos prevenir la mayor parte de los problemas de la fibrilación auricular si la tratamos a tiempo.

Desde el Servicio de Cardiología del Hospital Povisa y su Centro de Salud hemos diseñado una campaña para detectar la fibrilación auricular, orientado a las personas que más se pueden beneficiar del tratamiento para prevenir el ictus.

→ ¿En qué consiste el proyecto?:

La campaña va dirigida especialmente a hombres y mujeres de 65 años de edad o más, sin diagnóstico previo de fibrilación auricular. Les enviamos una invitación para que acudan a una consulta especial de enfermería en su Centro de Salud durante la semana indicada. En esta consulta se analizará el ritmo cardíaco palpando el pulso en la muñeca durante 20 segundos. A los individuos con un pulso "irregular" se les hará un electrocardiograma completo en la misma mañana de la visita para verificar si el ritmo cardíaco es normal o no. Si se confirmara la fibrilación auricular se programaría una visita preferente a su médico. Esta es la primera iniciativa de este tipo en nuestro medio y participan los Centros de Salud de Moaña, Beiramar y Coruxo, junto con el centro de especialidades del Hospital Povisa en la Calle Gran Vía.

### Resumen:

Debido a que muchas personas con fibrilación auricular no tienen ningún síntoma y pueden estar bajo un riesgo aumentado de ictus estamos organizando una campaña de diagnóstico de esta enfermedad. Basta acudir a su Centro de Salud en las fechas señaladas y dejarse tomar el pulso en la muñeca. Si tuviera un pulso anormal le harán un electrocardiograma para comprobar el ritmo cardíaco.

**¡Siempre es mejor prevenir!**

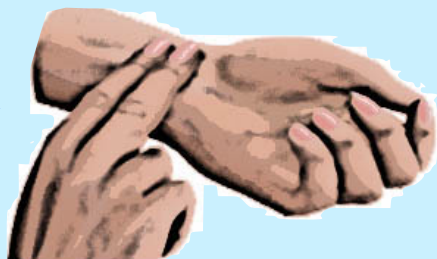

# La Fibrilación Auricular

## Campaña La Semana del Pulso"

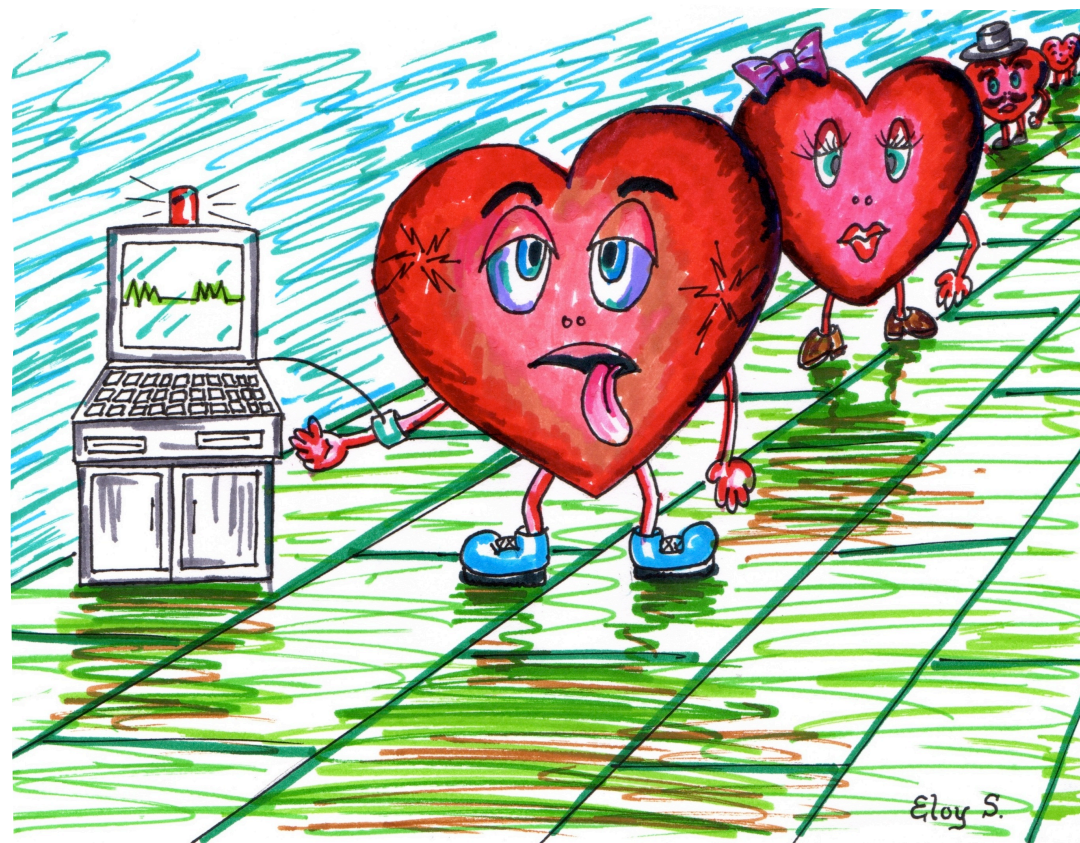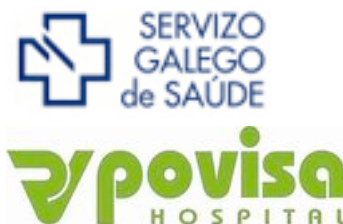

Conozca su riesgo de padecer un ictus si tiene fibrilación auricular



## ¿Qué es la fibrilación auricular?

El corazón cuenta con una especie de red de cables propia. Estos pequeños cables son capaces de generar su propia energía eléctrica que se transmite rápidamente por todo el músculo cardíaco. El funcionamiento latido a latido de este sistema es lo que conocemos como ritmo cardíaco. Las alteraciones del ritmo cardíaco normal las llamamos en el medio médico "arritmias". Precisamente la fibrilación auricular es la arritmia más frecuente que obliga al paciente a acudir a Urgencias o ingresar en un centro hospitalario.

## ¿Cómo se detecta?

La fibrilación auricular se diagnostica mediante el electrocardiograma, aunque la palpación del pulso o del pecho puede levantar la sospecha. Muchas veces es el paciente que nota palpitaciones o falta de aire y busca atención médica. Otras veces la arritmia no se nota y se hace el diagnóstico por casualidad, en un chequeo médico o en una consulta por cualquier otro motivo.

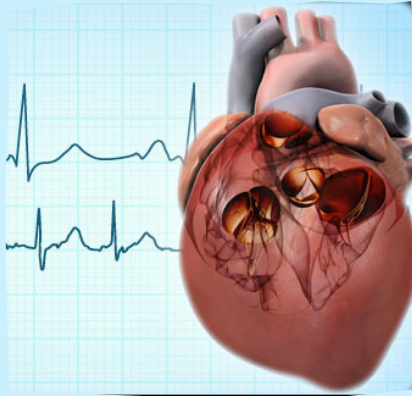

## La importancia de la fibrilación auricular

Esta arritmia es importante por dos razones:

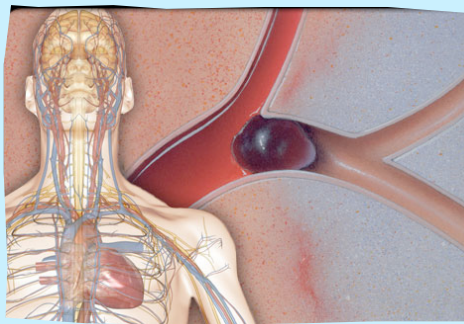

1º) El ritmo acelerado es menos eficaz para bombear la sangre y la persona con fibrilación auricular puede tener la tendencia a cansarse más con tareas normales. Otro problema es cuando el corazón está tan acelerado que acaba sufriendo falta de riego o va perdiendo fuerza de contracción. La mayoría de las veces esto mejora con el tratamiento.

2º) El segundo problema es el de los coágulos. Como hay una parte del

corazón que deja de moverse con la fibrilación auricular, por dentro de las cámaras cardíacas aparece la tendencia a formar coágulos. Afortunadamente, esto también se puede prevenir con medicación.

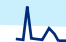

## ¿Por qué se produce la fibrilación auricular?

La fibrilación auricular se caracteriza por una actividad eléctrica desordenada en una parte del corazón conocida como aurículas. En esta arritmia, en lugar de haber un solo impulso eléctrico a través de las aurículas, aparecen varios impulsos a la vez, que hacen que el corazón se acelere y parezca caótico.

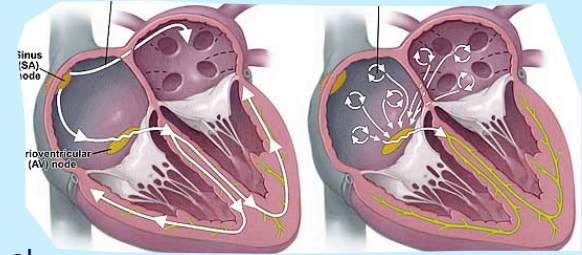

La fibrilación auricular suele aparecer en personas que padecen presión alta o enfermedades del corazón que hacen que las aurículas pasen por una situación de sobrecarga durante un cierto tiempo y acaben aumentando de tamaño. Por otro

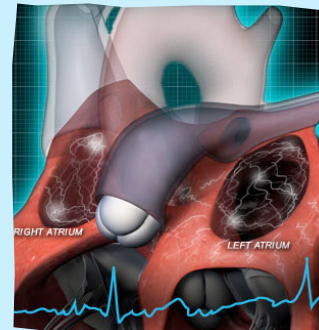

lado, la arritmia puede estar presente sin que exista ningún otro problema en el corazón. Si hay alguna otra enfermedad, puede ser de válvulas o del músculo cardíaco. La mayoría de las veces, la parte del corazón que hace el trabajo de bombear la sangre funciona bien.

Hay también algunas situaciones no cardíacas que favorecen la aparición de la fibrilación auricular, como enfermedades de la glándula tiroideas o problemas pulmonares.

## ¿Es una arritmia grave?

No. La mayoría de las veces el problema más importante no es la arritmia, si no la enfermedad cardíaca de base. De todas formas, la fibrilación auricular no es un problema banal. En personas de más de 65 años, con necesidad de medicación para controlar la presión arterial, diabetes o enfermedades del corazón, es frecuente que el médico indique un tratamiento anticoagulante para evitar la formación de coágulos que puedan salir del corazón a la corriente sanguínea y causar un infarto cerebral. El riesgo de estos coágulos varía entre el 1% y el 7% anual y es mayor en aquellos individuos que ya tuvieron un infarto cerebral previo o cualquier otra embolia.

La inmensa mayoría se controla bien con tratamiento.

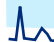

Supplement: mmc1 [file S1885585712002344:mmc1.pdf]
